# Supplementary material for: A Comprehensive Evaluation of the Burden of Heat-Related Illness and Death within the Florida Population
Source: MDPI journal article supplement (doi:10.3390/ijerph13060551), 2016-05-31
Supplement: s1 [file s1]

# Supplementary Materials: A Comprehensive Evaluation of the Burden of Heat-Related Illness and Death within the Florida Population

Laurel Harduar Morano, Sharon Watkins and Kristina Kintziger

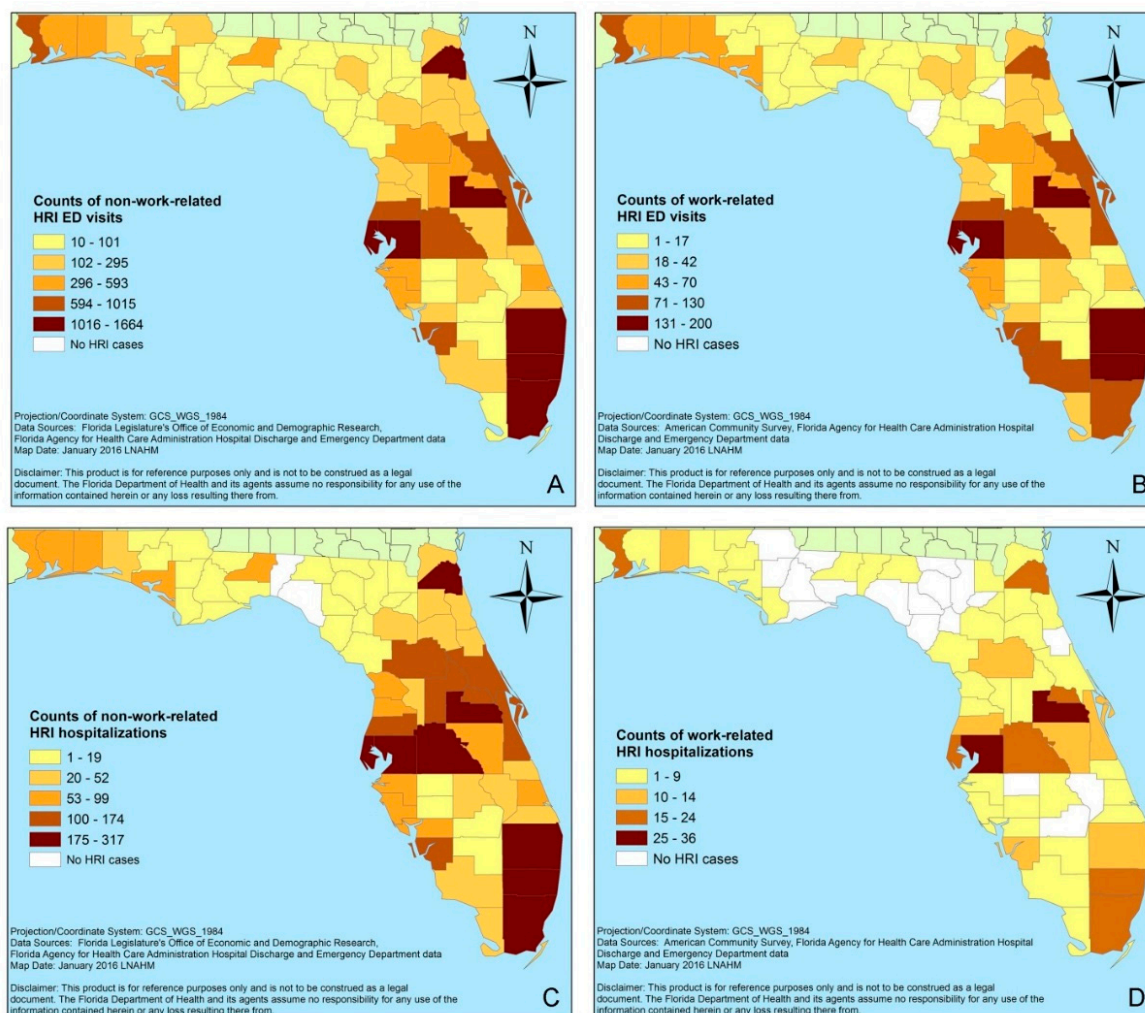

**Figure S1.** County-specific counts of HRI ED visits and hospitalizations among Florida residents during the warm season (2005–2012): (A) non-work-related HRI ED visits; (B) work-related HRI ED visits; (C) Non-work-related HRI hospitalizations; (D) work-related HRI hospitalizations.

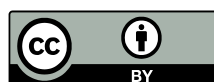

© 2016 by the authors; licensee MDPI, Basel, Switzerland. This article is an open access article distributed under the terms and conditions of the Creative Commons by Attribution (CC-BY) license (<http://creativecommons.org/licenses/by/4.0/>).
